# Supplementary material for: SGOL2 is a novel prognostic marker and fosters disease progression via a MAD2-mediated pathway in hepatocellular carcinoma
Source: Research Square preprint supplement (doi:10.21203/rs.3.rs-1846601/v1), 2022-07-29
Supplement: Supplementary file [file 2ca311a881809db96b5dadf2.pdf]

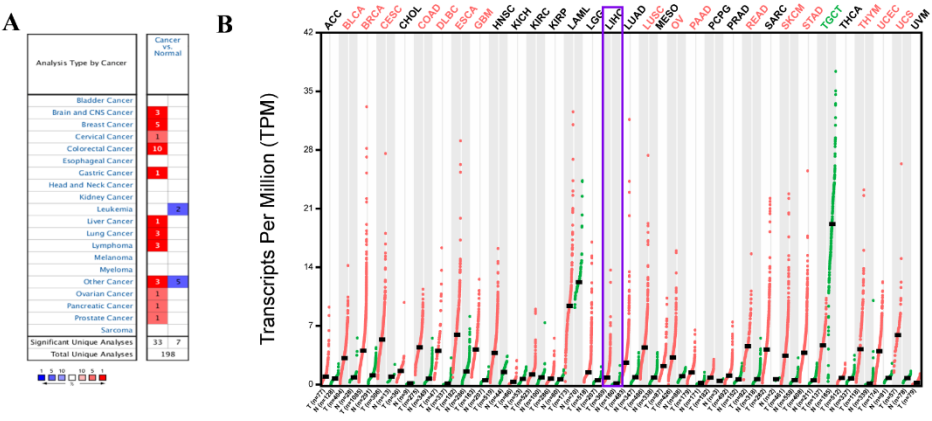

1

2 **FIGURE S1 High expression of SGOL2 in HCC in public database. A, SGOL2**

3 **overexpression was detected in various types of cancers in Oncomine database. B,**

4 **SGOL2 overexpression was detected in various types of cancers in GEPIA database.**

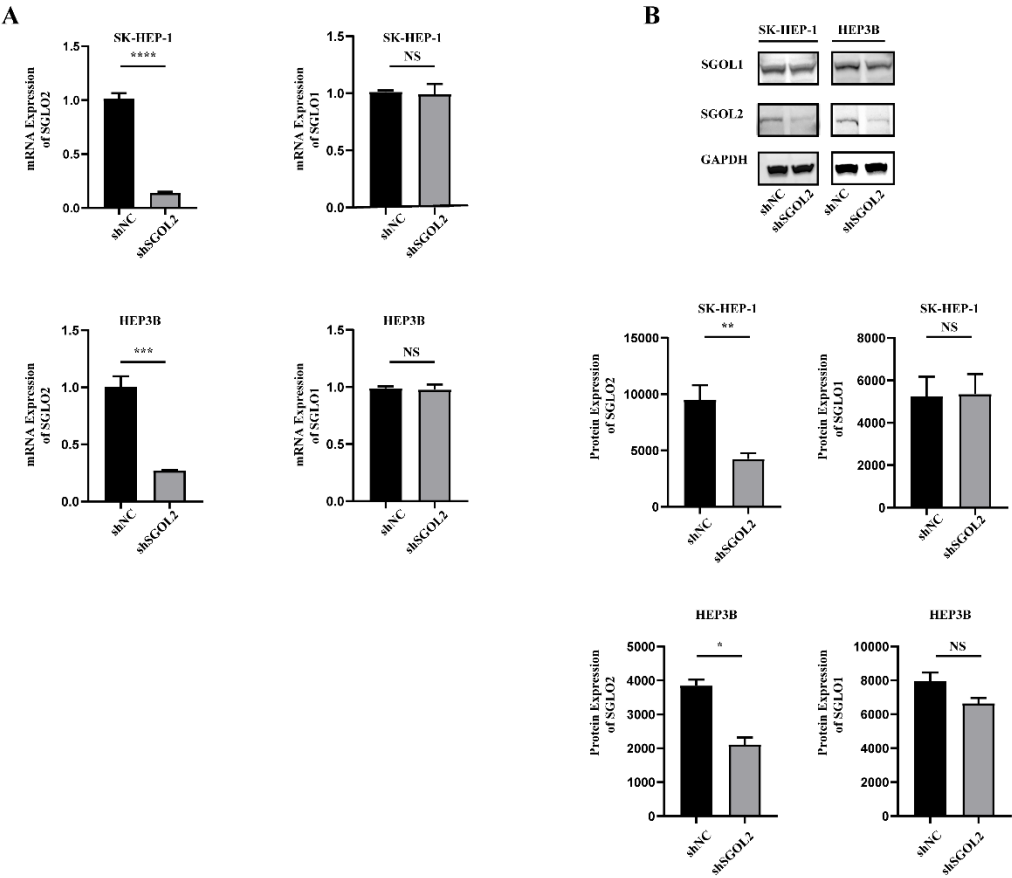

6 **FIGURE S2 The mRNA and protein levels of SGOL1 after the knockdown of**  
7 **SGOL2 in HCC cell lines. A, RT-PCR. B, Western blot. \*P<0.05, \*\*P<0.01,**  
8 **\*\*\*P<0.001, \*\*\*\*P<0.0001. NS=Not statistically significant.**

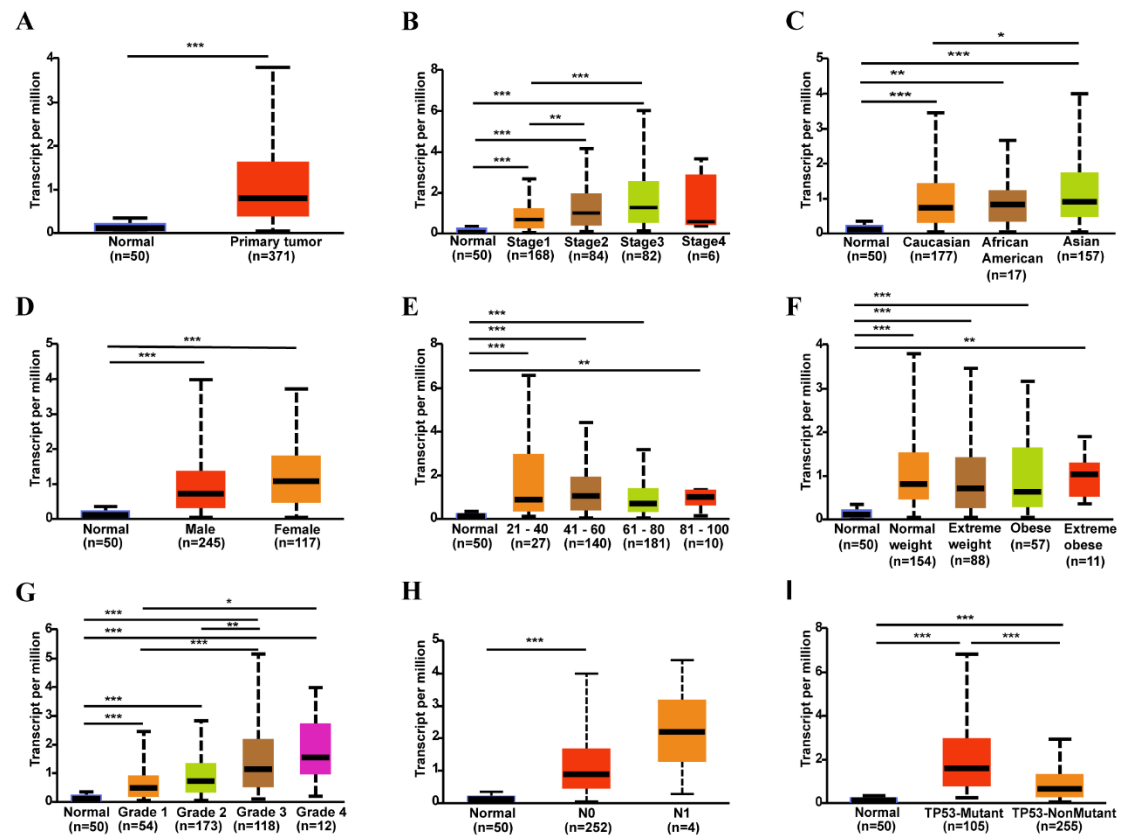

10 **FIGURE S3 Subgroup expression analysis of SGOL2 in HCC. A, SGOL2 mRNA**  
11 **expression levels in controls and HCC patients. B-I, SGOL2 mRNA expression levels**  
12 **of HCC patients in subgroups with various races, genders, ages, weights, tumor grades,**  
13 **metastatic statuses, and with TP-53 mutation or no TP-53 mutation. \*P<0.05, \*\*P<0.01,**  
14 **\*\*\*P<0.001, \*\*\*\*P<0.0001.**

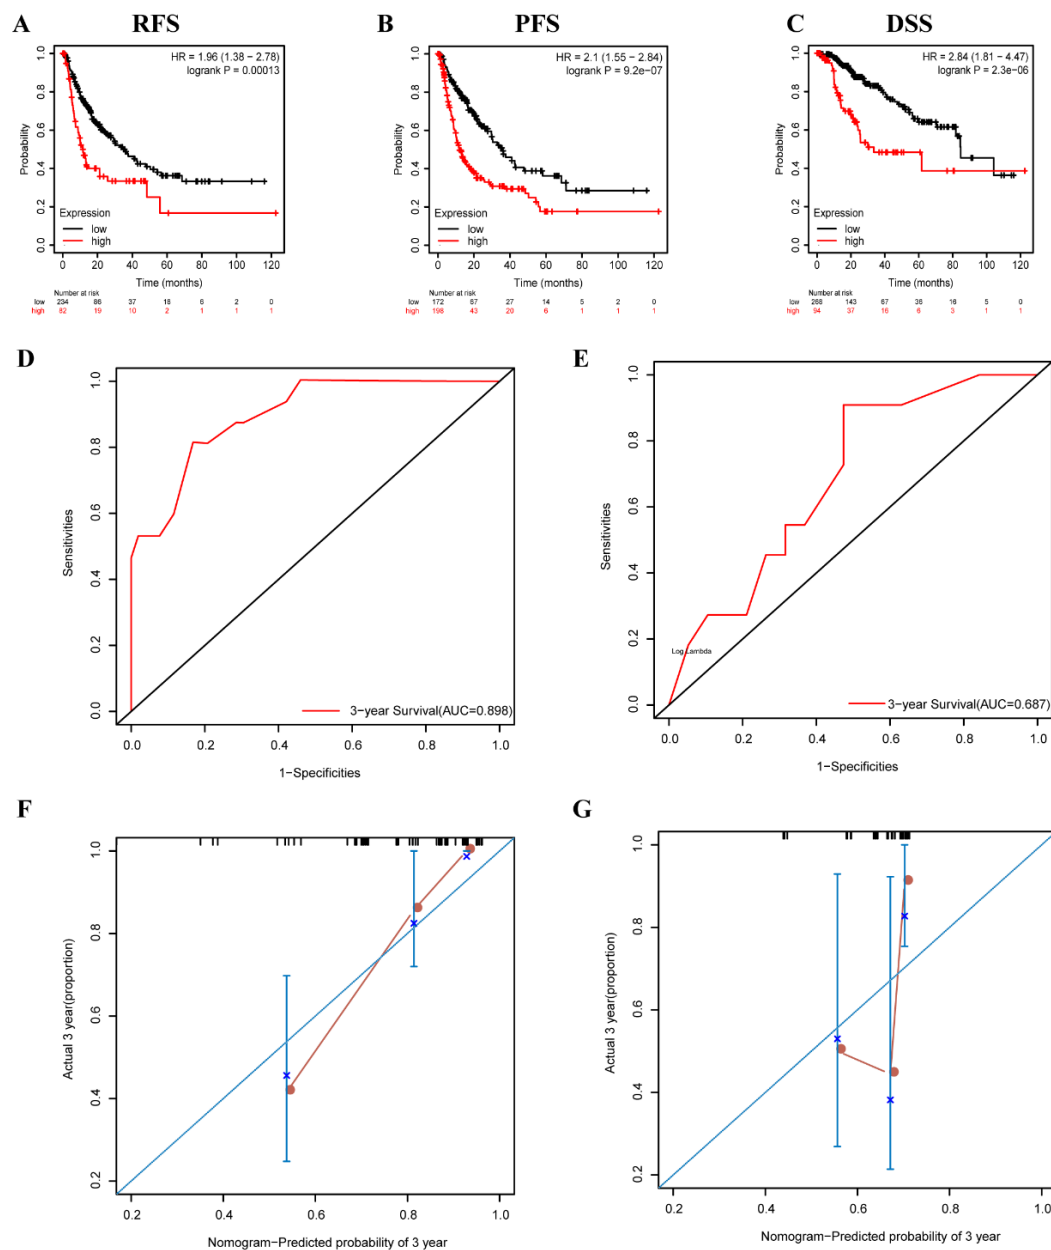

**FIGURE S4 Elevated expression of SGOL2 indicated a poor prognosis in HCC patients.** A-C, The prognostic value of SGOL2 in HCC patients based on the Kaplan–Meier Plotter database. D-E, ROC curve analysis was used to evaluate the performance of this nomogram for 3-year overall survival prediction in the training and validation groups. F-G, 3-year calibration curve in the training (left) and validation groups (right). OS, overall survival; RFS, relapse-free survival; PFS, progression-free survival; DSS, disease-specific survival; HR, hazard ratio.

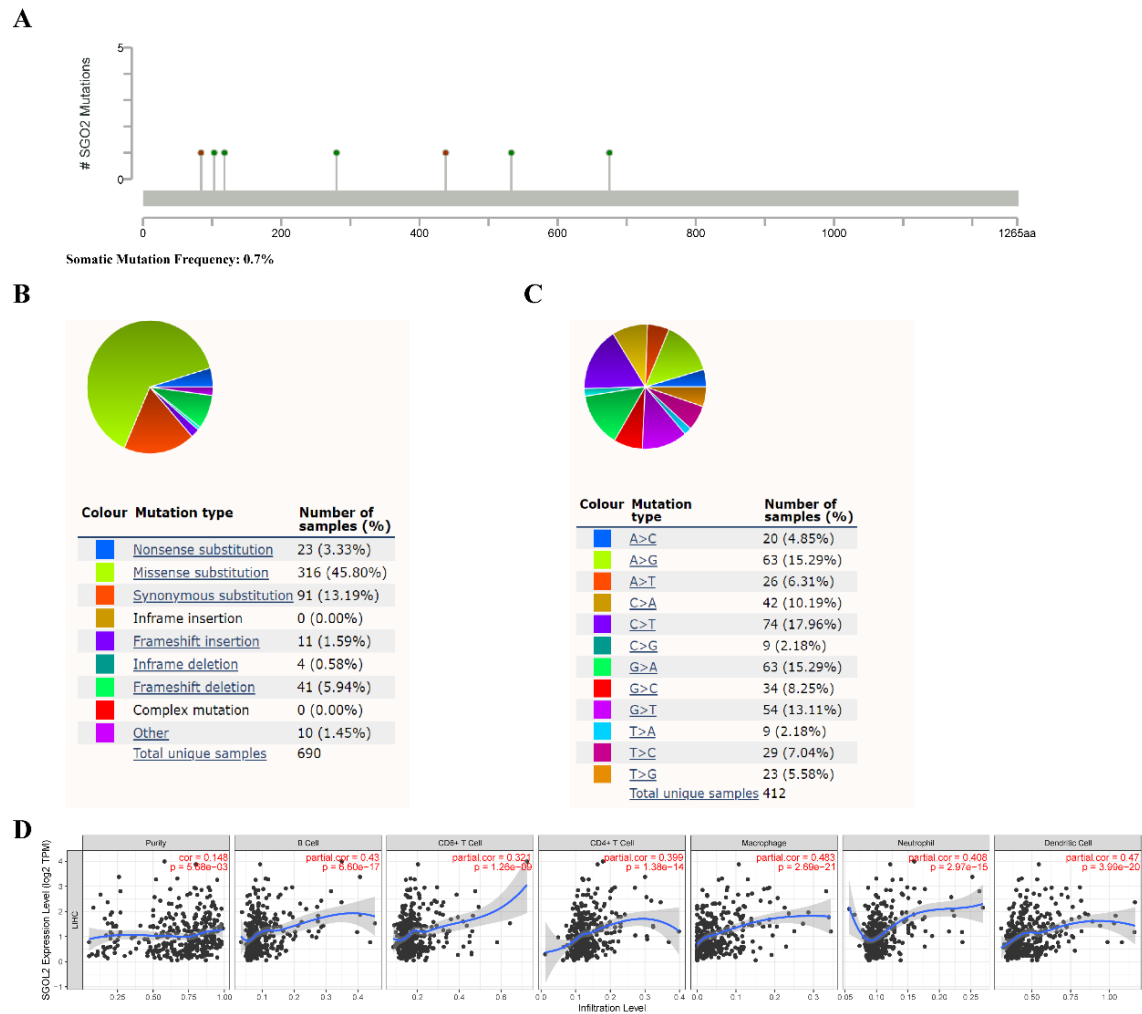

**FIGURE S5 SGOL2 mutations and the associations between SGOL2 and immune cells in HCC.** A-C, The representation of SGOL2 mutations in HCC (cBioPorta and COSMIC); D, SGOL2 is associated with immune infiltration in HCC (TIMER).

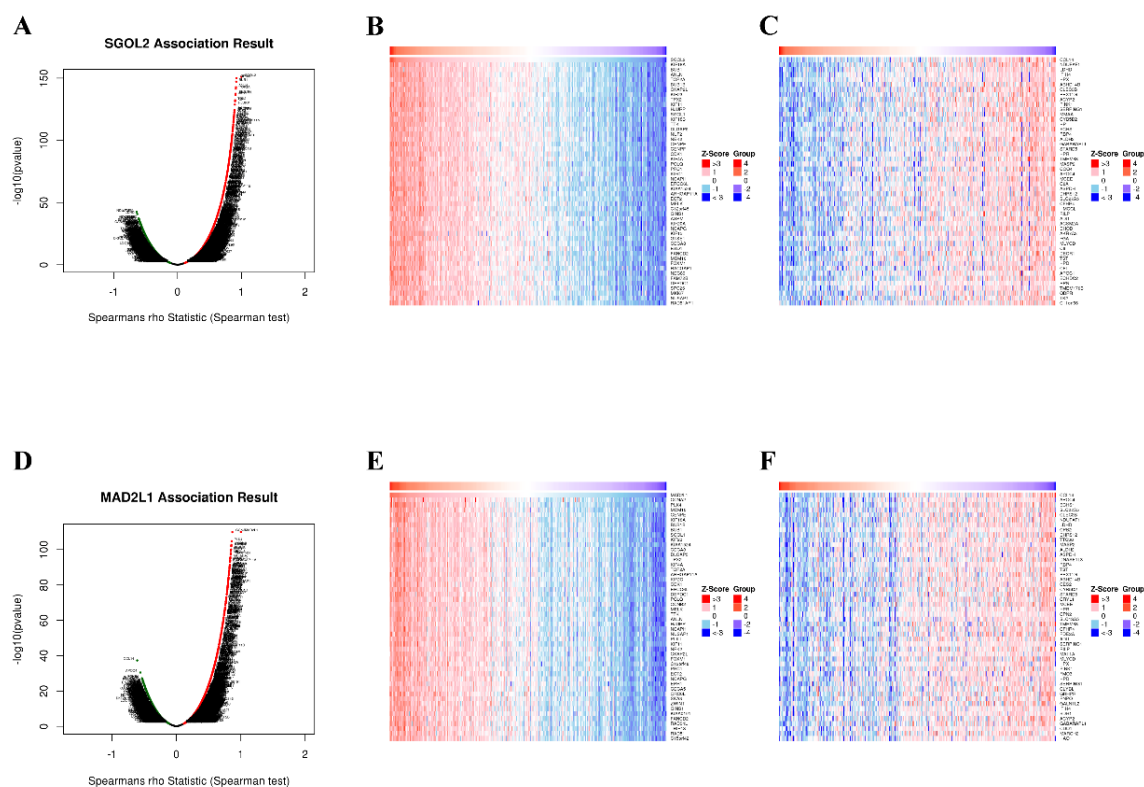

27

28 **FIGURE S6 Genes related to SGOL2 or MAD2 in HCC.** A, Differentially expressed

29 genes related to SGOL2. B-C, Genes positively or negatively related to SGOL2 (top

30 50). D, Differentially expressed genes related to MAD2. E-F, Genes positively or

31 negatively related to MAD2 (top 50).

A

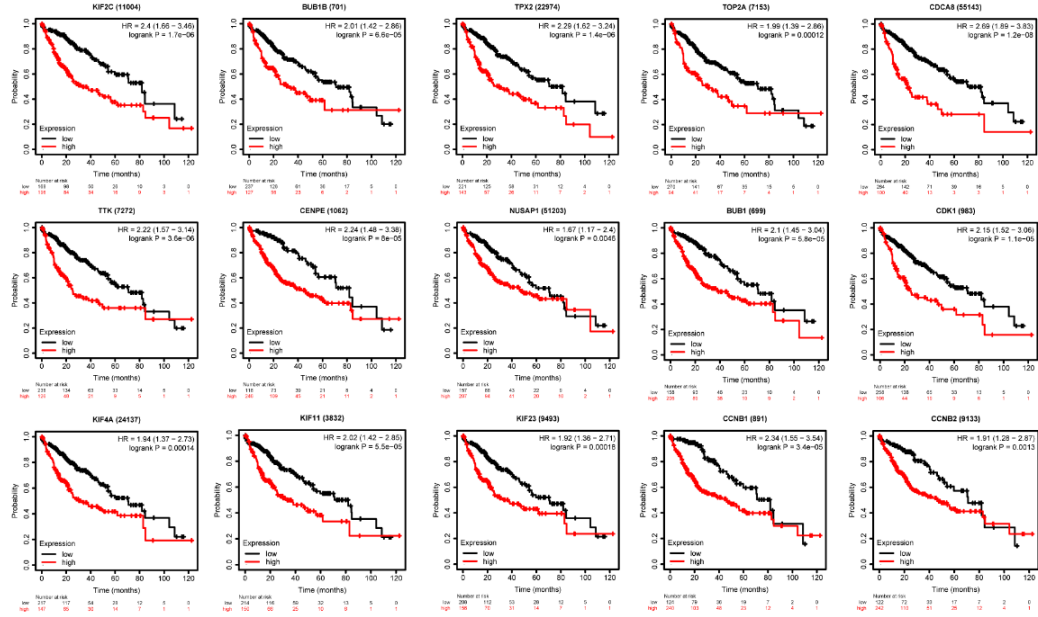

32

33 **FIGURE S7 Hub gene analysis. A, The prognostic values of the top 15 hub genes.**

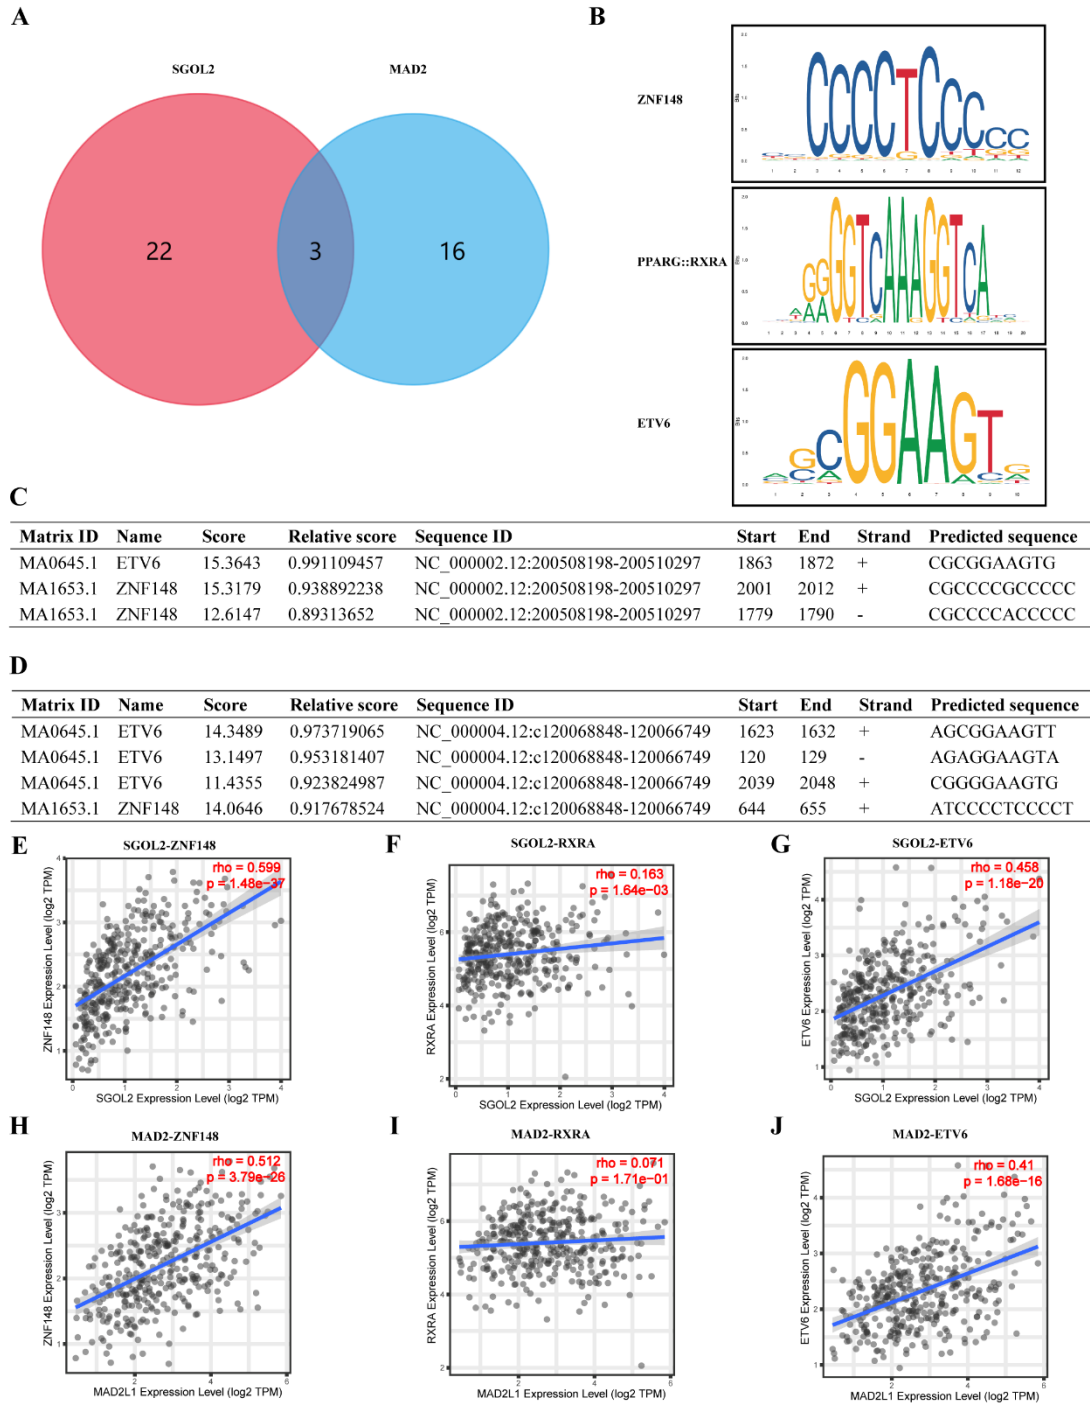

**FIGURE S8 The predicted transcription factors binding to SGOL2 or MAD2. A,** The predicted transcription factors binding to SGOL2 or MAD2 were visualized in a Venn diagram using the JASPAR database. B, The sequences of the three transcription factors. C-D, The transcription factor-binding site of ZNF148 or ETV6 in the gene promoter of SGOL2 or MAD2. E-J, ZNF148, or ETV6 is positively correlated with

40 SGOL2 or MAD2 in HCC (TIMER).

41
