# Supplementary material for: SGOL2 is a novel prognostic marker and fosters disease progression via a MAD2-mediated pathway in hepatocellular carcinoma
Source: Research Square preprint supplement (doi:10.21203/rs.3.rs-1846601/v1), 2022-07-29
Supplement: Supplementary file [file d7567b0a9b41a631452dfa72.pdf]

## **Methods:**

### **Mutation and immune infiltration analysis**

We assessed SGOL2 mutation types and frequencies in liver cancer by the cBioPortal database and the Catalog of Somatic Mutations in Cancer (COSMIC) database. The correlation between SGOL2 expression and immune cells was measured by the Tumor Immune Estimation Resource (TIMER) database.

### **Protein-Protein Interaction Networks Functional Enrichment Analysis**

We used the LinkedOmics database to search for differentially expressed genes related to SGOL2 and MAD2 and analyzed the RNA-Seq results in the TCGA-LIHC dataset. Then, the correlation coefficients of differentially expressed genes were determined by Spearman's test. We further used the STRING database (interaction score>0.8) and Cytoscape software (3.7.1) to construct the PPI network. We also verified the association between SGOL2 and MAD2 using the GEPIA database.

### **Biological function and pathway enrichment analysis**

We further analyzed the clusters of the network. Gene Ontology (GO) and Kyoto Encyclopedia of Genes and Genomes (KEGG) pathway analyses were then performed via the Database for Annotation, Visualization and Integrated Discovery (DAVID) and a bioinformatics online tool to determine the enriched biological processes and KEGG pathways for subsequent analysis.

**Materials:**

**Table 1: Antibodies for WB/Co-IP or IF for SGOL2 and MAD2**

| <b>Name</b>           | <b>WB/Co-IP</b>          | <b>IF</b>               |
|-----------------------|--------------------------|-------------------------|
| <b>SGOL2 antibody</b> | <b>Bethyl, A301–262A</b> | <b>Abcam, ab122258</b>  |
| <b>MAD2 antibody</b>  | <b>Bethyl, A300-301A</b> | <b>Santa Cruz, C-10</b> |
